# Supplementary material for: Cardiac cephalalgia: a narrative review and ICHD-3 criteria evaluation
Source: Springer Nature journal article supplement (doi:10.1186/s10194-022-01508-7), 2022-10-20
Supplement: MOESM1 [file 23624336]

| Author, year                   | Sex/age | Risk factors | Headache history | Location                        | Quality   | Intensity | Nausea | Photophobia or phonophobia | Aggravated by exertion | Symptoms of cardiac ischemia            | ECG                                             | Cardiac enzyme | Stress test                                      | Coronary angiogram            | Treatment |
|--------------------------------|---------|--------------|------------------|---------------------------------|-----------|-----------|--------|----------------------------|------------------------|-----------------------------------------|-------------------------------------------------|----------------|--------------------------------------------------|-------------------------------|-----------|
| Lefkowitz, 1982 <sup>7</sup>   | M/62    | NS           | NS               | Bregmatic                       | Explosive | Severe    | NS     | NS                         | Yes                    | Retrosternal pain, numbness both arms   | Chronic anterolateral ischemia                  | NS             | Headache and ST depression                       | Triple-vessel disease         | CAB       |
| Fleetcroft, 1985 <sup>8</sup>  | F/78    | NS           | NS               | Frontal to mouth                | NS        | NS        | NS     | NS                         | Yes                    | Chest pain radiating to both arms       | ST elevation II, III, aVF                       | NS             | NS                                               | NS                            | Medical   |
| Blacky, 1987 <sup>9</sup>      | M/40    | No           | NS               | Bitemporal                      | NS        | NS        | No     | NS                         | Yes                    | None                                    | NS                                              | NS             | Headache and inferolateral ST-segment depression | 100% CXA, severe stenosis RCA | Medical   |
| Vernay, 1989 <sup>10</sup>     | M/71    | Smoking      | NS               | Occipital, parietal and frontal | NS        | NS        | NS     | NS                         | Yes                    | Shoulder numbness, substernal tightness | Q wave in III and chronic anteroapical ischemia | NS             | Headache and ST depression                       | NS                            | Medical   |
| Takayanagi, 1990 <sup>11</sup> | M/67    | NS           | NS               | Occipital                       | NS        | Severe    | NS     | NS                         | NS                     | Chest pressure                          | ST elevation/vent                               | NS             | NS                                               | NS                            | Death     |

|                               |      |                                   |     |                         |           |        |     |    |     |                                   |                                                                                                                                                                 |    |                                                                                             |                                                          |       |
|-------------------------------|------|-----------------------------------|-----|-------------------------|-----------|--------|-----|----|-----|-----------------------------------|-----------------------------------------------------------------------------------------------------------------------------------------------------------------|----|---------------------------------------------------------------------------------------------|----------------------------------------------------------|-------|
|                               |      |                                   |     |                         |           |        |     |    |     |                                   | ricular<br>fibrillation                                                                                                                                         |    |                                                                                             |                                                          |       |
|                               | F/64 | CAD                               | NS  | NS                      | NS        | NS     | NS  | NS | NS  | Chest<br>pressure                 | ST elevation<br>and Q waves in<br>II, III                                                                                                                       | NS | NS                                                                                          | Triple-<br>vessel<br>disease<br>(95%<br>LAD,<br>99% RCA) | Death |
| Bowen,<br>1993 <sup>12</sup>  | M/59 | HT,<br>obesity,<br>HL,<br>smoking | Yes | Bitemporal              | NS        | Severe | No  | No | NS  | Left arm<br>and chest<br>pressure | ST<br>Depression in<br>anterior leads                                                                                                                           | NS | NS                                                                                          | 100%<br>RCA, 95%<br>CXA                                  | PTCA  |
| Ishida,<br>1996 <sup>13</sup> | M/64 | Smoking                           | No  | Occipital               | Throbbing | Severe | Yes | NS | No  | Bilateral<br>shoulder<br>pain     | Q and<br>inverted T<br>waves in<br>inferior leads                                                                                                               | ↑  | Headache<br>and ST-<br>segment<br>depression                                                | Triple-<br>vessel<br>disease<br>(99%<br>RCA, 75%<br>CXA) | PTCA  |
| Grace,<br>1997 <sup>14</sup>  | M/59 | NS                                | No  | Vertex and<br>occipital | Bursting  | Severe | NS  | NS | Yes | No                                | T wave<br>inversion in<br>aterolateral<br>leads                                                                                                                 | NS | Headache<br>with<br>ST<br>depression                                                        | Subocclusion<br>RCA,<br>70% LDA                          | CAB   |
| Lipton,<br>1997 <sup>3</sup>  | M/57 | Past<br>smoking                   | NS  | Vertex                  | sharp     | Severe | Yes | No | Yes | Chest<br>discomfort               | Flattened T<br>waves in II,<br>and<br>aVL, an<br>inverted T<br>wave in V <sub>5</sub> ,<br>and biphasic T<br>waves in III, V <sub>4</sub><br>and V <sub>6</sub> | NS | Headache<br>and ST<br>depression<br>in<br>leads II,<br>III, aVF,<br>and<br>V <sub>4-6</sub> | Triple-<br>vessel<br>disease                             | CAB   |

|                              |      |                  |    |                             |          |        |     |    |     |                         |                                                |    |                                                                |                                                    |       |
|------------------------------|------|------------------|----|-----------------------------|----------|--------|-----|----|-----|-------------------------|------------------------------------------------|----|----------------------------------------------------------------|----------------------------------------------------|-------|
|                              | M/67 | HT, past smoking | NS | Bifrontal                   | Pressing | Severe | No  | No | Yes | No                      | Possible old inferior wall myocardial infarct  | NS | Headache and inferolateral ST depression                       | Triple-vessel disease                              | PTCA  |
| Lance, 1998 <sup>15</sup>    | M/62 | Smoking, HL      | No | Right frontal               | NS       | NS     | NS  | NS | Yes | Chest tightness         | NS                                             | NS | Headache and ST depression                                     | 100% LAD, 100% RCA                                 | CAB   |
| Lanza, 2000 <sup>16</sup>    | M/68 | Smoking, HL      | NS | Occipital                   | NS       | NS     | NS  | NS | NS  | Bilateral shoulder pain | Normal                                         | ↑  | Headache and T wave peaking in V <sub>2-4</sub>                | Triple-vessel disease (90% LAD, 90% CXA, 100% RCA) | CAB   |
| Rambihar, 2001 <sup>17</sup> | F/56 | NS               | NS | Occipital                   | NS       | NS     | NS  | NS | Yes | Shoulders and left arm  | ST depression I, II, aVF, and V <sub>4-6</sub> | NS | Headache and ST depression in I, II, sVF, and V <sub>4-6</sub> | 40% LM, 90% CXA, 99% RCA                           | CAB   |
|                              | F/NS | NS               | NS | Occipital                   | NS       | NS     | NS  | NS | NS  | None                    | NS                                             | NS | Positive                                                       | NS                                                 | Death |
| Amendo, 2001 <sup>18</sup>   | F/78 | HT, HL           | NS | Bitemporal                  | NS       | Severe | Yes | NS | NS  | NS                      | ST elevation in I and aVL                      | ↑  | NS                                                             | Triple-vessel disease                              | CAB   |
|                              | F/77 | No               | No | Right frontal and maxillary | NS       | Severe | NS  | NS | NS  | None                    | T inversion                                    | ↑  | NS                                                             | Normal coronary arteries                           | NS    |
| Auer, 2001 <sup>19</sup>     | M/47 | Smoking, HL      | NA | Occipital                   | NS       | NS     | NS  | NS | NS  | NS                      | ST elevation                                   | NS | NS                                                             | Autopsy: 100%                                      | Death |

|                                       |      |                     |    |                                 |                 |                   |     |     |     |                               |                                                                               |    |                                                          |                       |                  |
|---------------------------------------|------|---------------------|----|---------------------------------|-----------------|-------------------|-----|-----|-----|-------------------------------|-------------------------------------------------------------------------------|----|----------------------------------------------------------|-----------------------|------------------|
|                                       |      |                     |    |                                 |                 |                   |     |     |     |                               | in I and aVL and ST depression in II, III, and aVF / Ventricular fibrillation |    |                                                          | LAD, 80% RCA          |                  |
| Famularo, 2002 <sup>20</sup>          | M/70 | HT, smoking, stroke | No | Bilateral frontoparietal        | Sharp           | Severe            | No  | No  | NS  | Sweating                      | ST elevation and T-wave inversion V <sub>2</sub> -V <sub>3</sub> and aVF      | ↑  | Normal stress                                            | NS                    | Medical          |
| Gutiérrez-Morlote, 2002 <sup>21</sup> | M/59 | HT, HL, CAD         | No | Bilateral, occipital and vertex | Dull, throbbing | Moderate - Severe | Yes | Yes | NS  | Chest discomfort and sweating | ST-segment depression                                                         | NS | NS                                                       | NS                    | Medical          |
| Martínez, 2003 <sup>22</sup>          | F/68 | HT, DM, smoking     | No | Hemicranial and facial          | Shooting        | Severe            | No  | No  | Yes | None                          | Inverted T waves in V <sub>2</sub> -V <sub>4</sub>                            | NS | Headache and anterior, lateral, and septal ST depression | Triple-vessel disease | PTCA             |
| Sathirapanya, 2004 <sup>23</sup>      | M/58 | TIA, smoking        | No | Left occipital                  | Sharp, shooting | Severe            | No  | No  | Yes | Chest tightness               | ST-T elevation V <sub>1</sub> -V <sub>3</sub>                                 | NS | Positive                                                 | Triple-vessel disease | CAB              |
| Chen, 2004 <sup>6</sup>               | M/76 | HT                  | NS | Bitemporal                      | NS              | Severe            | No  | No  | Yes | Chest tightness               | inverted T waves in leads I and AVL                                           | NS | Headache and ST depression in II, III, and aVF           | 90% LAD, 50% RCA      | PTCA and Medical |

|                                       |      |                               |     |                                              |                  |        |     |    |     |                           |                                                                                          |    |                   |                          |         |
|---------------------------------------|------|-------------------------------|-----|----------------------------------------------|------------------|--------|-----|----|-----|---------------------------|------------------------------------------------------------------------------------------|----|-------------------|--------------------------|---------|
| Gutiérrez-Morlote, 2005 <sup>24</sup> | F/74 | Stroke, DM, obesity           | No  | Bitemporal                                   | Throbbing        | Severe | Yes | NS | NS  | Chest tightness, sweating | ST depression in V <sub>2</sub> -V <sub>4</sub>                                          | ↑  | NS                | NS                       | Medical |
|                                       | F/64 | HT, HL, obesity, DM           | No  | Unilateral, radiation to jaw                 | Pressing         | Severe | NS  | NS | Yes | No                        | NS                                                                                       | NS | NS                | NS                       | Death   |
| Korantzopoulos, 2005 <sup>25</sup>    | F/73 | HT, HL, obesity               | No  | Occipital                                    | Sharp            | Severe | Yes | NS | NS  | No                        | ST depression V <sub>2</sub> -V <sub>5</sub>                                             | ↑  | Normal            | 70% LAD                  | Medical |
| Cutrer, 2006 <sup>26</sup>            | M/55 | HT, HL, obesity, past smoking | No  | Bilateral parietal, radiation to the jaws    | NS               | NS     | No  | No | Yes | No                        | NS                                                                                       | NS | Inferior ischemia | 100% RCA, 60% LAD        | PCTA    |
| Seow, 2007 <sup>27</sup>              | M/35 | Smoking                       | Yes | NS                                           | Explosive        | Severe | Yes | No | NS  | Sweating                  | ST elevation V <sub>1-4</sub>                                                            | ↑  | NS                | 100% LAD                 | PTCA    |
| Broner, 2007 <sup>28</sup>            | F/72 | No                            | No  | Bi-occipital, radiating to bi-frontal region | Sharp, throbbing | Severe | Yes | No | No  | No                        | ST elevation II, III and avF and depression in I, avL, V <sub>1</sub> and V <sub>2</sub> | ↑  | NS                | 100% RCA                 | Medical |
| Wei, 2007 <sup>29</sup>               | M/36 | Stroke                        | NS  | Vertex, occipital bilateral                  | Dull             | Severe | NS  | NS | NS  | Cardiac arrest            | ST segment elevation V <sub>2</sub> -V <sub>6</sub>                                      | NS | NS                | 90% LAD                  | PTCA    |
|                                       | F/85 | None                          | NS  | Right eyeball pain                           | NS               | NS     | NS  | NS | NS  | Chest pain                | NS                                                                                       | NS | NS                | Normal coronary arteries | Medical |

|                                 |      |            |    |                                                       |           |        |     |    |     |                             |                                                                                   |    |    |                                         |         |
|---------------------------------|------|------------|----|-------------------------------------------------------|-----------|--------|-----|----|-----|-----------------------------|-----------------------------------------------------------------------------------|----|----|-----------------------------------------|---------|
|                                 |      |            |    |                                                       |           |        |     |    |     |                             |                                                                                   |    |    | (Apical hypertrophy)                    |         |
| Wang, 2008 <sup>30</sup>        | F/81 | HT         | NS | NS                                                    | NS        | Severe | Yes | NS | NS  | Diaphoresis, cardiac arrest | Ventricular fibrillation                                                          | NS | NS | 99% CXA                                 | PTCA    |
| Dalzell, 2009 <sup>31</sup>     | F/44 | Smoking    | NS | Occipital                                             | NS        | Severe | Yes | NS | NS  | No                          | Inferior ST elevation and ST-depression in leads V <sub>2</sub> -V <sub>3</sub>   | ↑  | NS | 100% RCA                                | PTCA    |
| Sendovski, 2009 <sup>32</sup>   | F/61 | HT, HL     | NS | Frontal, holocranial, neck, upper back, jaw and teeth | NS        | Severe | No  | No | Yes | No                          | ST depression at the lateral wall and a mild ST elevation at the precordial leads | ↑  | NS | 70% LAD, 80% RCA, 95% CXA, 90% PDA      | PTCA    |
| Chatzizisis, 2010 <sup>33</sup> | M/42 | None       | NS | Frontal, bitemporal                                   | NS        | Severe | NS  | NS | NS  | No                          | Q Wave, mild ST elevation and inverted T wave in V <sub>2</sub> -V <sub>5</sub>   | ↑  | NS | 100% LAD                                | PTCA    |
| Cheng, 2010 <sup>34</sup>       | F/52 | NS         | NS | Bilateral                                             | Throbbing | Severe | Yes | NS | Yes | Chest pain                  | Normal                                                                            | ↑  | NS | Normal coronaries (suspected vasospasm) | Medical |
|                                 | F/67 | HT, DM, HL | No | Bilateral, temporoparietal and jaws                   | Throbbing | Severe | No  | NS | Yes | Dyspnea                     | Normal                                                                            | NS | NS | Two-vessel disease                      | PTCA    |

|                                 |      |                     |     |                                            |          |          |    |    |     |                                      |                                                                                                    |    |                                            |                                            |         |
|---------------------------------|------|---------------------|-----|--------------------------------------------|----------|----------|----|----|-----|--------------------------------------|----------------------------------------------------------------------------------------------------|----|--------------------------------------------|--------------------------------------------|---------|
| Yang, 2010 <sup>35</sup>        | F/44 | No                  | NS  | Bilateral, frontal, parietal and occipital | NS       | Severe   | No | No | Yes | Chest tightness                      | Normal                                                                                             | NS | Headache and ST depression                 | RCA vasospasm                              | Medical |
| Costopoulos, 2011 <sup>36</sup> | M/55 | HT, HL, smoking, DM | NS  | Occipital to vertex                        | NS       | NS       | NS | NS | Yes | Breathlessness                       | Widespread ST depression                                                                           | ↑  | NS                                         | Triple-vessel disease                      | CAB     |
| Elgharably, 2013 <sup>37</sup>  | M/55 | Past smoking        | No  | Frontal                                    | NS       | Severe   | No | No | NS  | Chest pain                           | Q wave in III and aVF                                                                              | ↑  | NS                                         | LAD                                        | PTCA    |
| Asvestas, 2014 <sup>38</sup>    | M/86 | HT, smoking         | NS  | Occipital                                  | NS       | Severe   | NS | NS | NS  | No                                   | ST depression in V <sub>1</sub> -V <sub>5</sub> and ST elevation in V <sub>7</sub> -V <sub>9</sub> | ↑  | NS                                         | Triple-vessel disease (100% CXA, LAD, RCA) | PTCA    |
| Wassef, 2014 <sup>39</sup>      | M/44 | HL                  | NS  | NS                                         | Pressing | Severe   | NS | NS | Yes | Chest discomfort                     | Normal                                                                                             | NS | Headache and lateral ST segment depression | 100% LAD                                   | PTCA    |
| Mathew, 2015 <sup>40</sup>      | M/42 | HT                  | Yes | Throbbing, bioccipital to vertex           | NS       | Variable | No | No | Yes | Palpitations and shortness of breath | NS                                                                                                 | NS | Positive                                   | 99% LAD                                    | PTCA    |

|                               |      |              |     |                                         |                 |          |     |    |     |                                          |                                                       |        |                                                          |                                                     |      |
|-------------------------------|------|--------------|-----|-----------------------------------------|-----------------|----------|-----|----|-----|------------------------------------------|-------------------------------------------------------|--------|----------------------------------------------------------|-----------------------------------------------------|------|
| Chowdhury, 2015 <sup>41</sup> | M/51 | HT           | NS  | Temporal, frontal, vertex and occipital | NS              | NS       | No  | No | Yes | Chest tightness, sweating                | NS                                                    | NS     | Headache and ST-T changes                                | 70% LAD, 95% CXA                                    | PTCA |
| Prakash, 2016 <sup>42</sup>   | M/67 | Smoking      | NS  | Holocranial                             | NS              | Severe   | Yes | No | Yes | No                                       | Q in II, III, aVF                                     | NS     | Headache and ST depression in inferior leads             | Triple-vessel disease (90% RCA, 75% LAD, 70% CXA)   | CAB  |
| Huang, 2016 <sup>43</sup>     | F/70 | HT, DM, HL   | Yes | Bilateral neck pain and temporal        | Dull, squeezing | NA       | No  | No | NS  | Dizziness                                | ST-elevation V <sub>2</sub> -V <sub>6</sub>           | ↑      | NS                                                       | LAD                                                 | PTCA |
| Shankar, 2016 <sup>44</sup>   | M/73 | DM, stroke   | No  | Holocranial                             | Dull            | severe   | NS  | NS | Yes | Chest pain                               | inferior-lateral ST depression                        | NS     | Headache and ST depression in the inferior-lateral leads | Triple-vessel disease                               | CAB  |
| Wang, 2017 <sup>45</sup>      | M/40 | Past smoking | NS  | Bitemporal                              | Pulsatile       | Moderate | No  | No | Yes | Chest discomfort, palpitations, sweating | Inverted T wave                                       | Normal | NS                                                       | Triple-vessel disease (100% LAD, 100% RCA, 80% CXA) | PTCA |
| Majumder, 2017 <sup>46</sup>  | F/48 | DM           | NS  | NS                                      | NS              | Severe   | NS  | NS | Yes | NS                                       | ST depression with T-wave inversion in inferior leads | ↑      | NS                                                       | LAD, RCA                                            | PCTA |



|                                |      |              |     |                                   |               |          |     |    |     |                                                   |                                                           |        |                             |                                                   |         |
|--------------------------------|------|--------------|-----|-----------------------------------|---------------|----------|-----|----|-----|---------------------------------------------------|-----------------------------------------------------------|--------|-----------------------------|---------------------------------------------------|---------|
| MacIsaac, 2019 <sup>47</sup>   | M/86 | No           | NS  | Bilateral holocranial             | Dull          | Severe   | No  | No | No  | Chest heaviness and dyspnea                       | Normal                                                    | Normal | Inferolateral ST depression | Triple-vessel disease (90% RCA, 50% LAD, 60% CXA) | Medical |
| Lazari, 2019 <sup>48</sup>     | M/64 | Smoking      | Yes | Holocranial                       | Compressing   | Severe   | NS  | NS | NS  | No                                                | ST elevation II, III and aVF                              | NS     | NS                          | RCA                                               | PTCA    |
| Santos, 2019 <sup>49</sup>     | M/62 | HT, DM       | No  | Holocranial                       | NS            | Severe   | Yes | No | No  | Chest pain                                        | no ST elevation                                           | ↑      | NS                          | Triple-vessel disease                             | CAB     |
| Ruiz Ortiz, 2020 <sup>50</sup> | F/78 | HT, DM, HL   | NS  | Vertex, bifrontal, laterocervical | Compressing   | Moderate | Yes | No | Yes | No                                                | ST lateral and inferior                                   | ↑      | NS                          | Triple-vessel disease                             | PTCA    |
| Sun, 2021 <sup>51</sup>        | F/83 | No           | NS  | NS                                | NS            | NS       | NS  | NS | NS  | No                                                | ST elevation II, III, aVF, V <sub>7</sub> -V <sub>9</sub> | ↑      | NS                          | RCA                                               | PTCA    |
| Kobata, 2022 <sup>52</sup>     | M/69 | Smoking, CAD | NS  | Occipital                         | Pulsatile     | Severe   | Yes | NS | NS  | Chest discomfort, sweating, loss of consciousness | ST elevation in II, III, aVF                              | ↑      | NS                          | RCA                                               | PTCA    |
| Kobata, 2022 <sup>52</sup>     | F/66 | No           | NS  | Occipital                         | NS            | Severe   | NS  | NS | NS  | Chest discomfort, sweating                        | ST elevation in II, III, aVF, V <sub>2</sub> -4           | ↑      | NS                          | LAD                                               | PTCA    |
| Kobata, 2022 <sup>52</sup>     | M/54 | Smoking, HT, | NS  | Occipital                         | Strangulation | Moderate | Yes | NS | NS  | Chest discomfort, sweating                        | ST elevation in II, III, aVF                              | ↑      | NS                          | Triple-vessel disease                             | PTCA    |

|                               |      |                |    |    |    |        |     |    |    |    |                                                                         |   |    |                              |      |
|-------------------------------|------|----------------|----|----|----|--------|-----|----|----|----|-------------------------------------------------------------------------|---|----|------------------------------|------|
|                               |      | DM,<br>HL      |    |    |    |        |     |    |    |    |                                                                         |   |    |                              |      |
| Kobata,<br>2022 <sup>52</sup> | M/72 | Smoking,<br>HT | NS | NS | NS | Severe | Yes | NS | NS | No | ST elevation in<br>aVR, ST<br>depression in<br>II, III, aVF and<br>V2-5 | ↑ | NS | Triple-<br>vessel<br>disease | PTCA |

*M: Male; F: Female; NS: Not specified; CAB: Coronary artery by-pass; CXA: Circumflex artery; RCA: Right coronary artery; CAD: Coronary artery disease; HT: Hypertension; HL: Hyperlipidemia; PTCA: Percutaneous transluminal coronary angioplasty; LAD: Left anterior descending artery; PDA: posterior descending artery; DM: Diabetes mellitus; LM: Left main; TIA: transient cerebral ischemic attack.*
